# Supplementary material for: A Bibliometric Analysis of Dhat Syndrome
Source: MDPI journal article supplement (doi:10.3390/psychiatryint2040029), 2021-10-19
Supplement: s1 [file s1]

Supplementary file 1: List of articles

| <b>S<br/>N</b> | <b>Authors</b>                                                                          | <b>Title</b>                                                                                                              | <b>Year</b> | <b>Journal</b>                                        |
|----------------|-----------------------------------------------------------------------------------------|---------------------------------------------------------------------------------------------------------------------------|-------------|-------------------------------------------------------|
| 1              | Manore S., Vankar G.K., Gedam S.                                                        | Dhat syndrome: Depression, help-seeking and patient beliefs about causation and consequences                              | 2020        | International Journal of Current Research and Review  |
| 2              | Ghosh S., Chowdhury A.                                                                  | A case of two culture-bound syndromes (Koro and Dhat syndrome) coexisting with obsessive-compulsive disorder              | 2020        | Indian Journal of Psychiatry                          |
| 3              | Prakash S., Sharan P., Sood M.                                                          | A qualitative study on psychopathology of dhat syndrome in men: Implications for classification of disorders              | 2018        | Asian Journal of Psychiatry                           |
| 4              | Shoib S., Das S., Singhal S., Rashid A., Mishtaq R., Manzoor M.                         | Dhat syndrome – A culture-bound sex neurosis of the Indian subcontinent: A prospective randomized study                   | 2018        | International Journal of Culture and Mental Health    |
| 5              | Khambaty M., Parikh R.M.                                                                | Cultural aspects of anxiety disorders in India                                                                            | 2017        | Dialogues in Clinical Neuroscience                    |
| 6              | MacFarland A.S., Al-Maashani M., Al Busaidi Q., Al-Naamani A., El-Bouri M., Al-Adawi S. | Culture-specific pathogenicity of dhat (semen loss) syndrome in an Arab/Islamic society, Oman                             | 2017        | Oman Medical Journal                                  |
| 7              | Pal A., Mallik N., Acharya R., Mondal D.K.                                              | Epidemiology of patients attending a special clinic on sexual dysfunction from Eastern India: A retrospective data review | 2017        | Medical Journal of Dr. D.Y. Patil University          |
| 8              | Uvais N.A.                                                                              | Dhat syndrome among the islamic populations of India and Pakistan                                                         | 2017        | Oman Medical Journal                                  |
| 9              | Mitra S., Singh M., Sinha V., Anwar Z.                                                  | “Dhat syndrome” – How a man lost his bones!                                                                               | 2017        | Asian Journal of Psychiatry                           |
| 10             | Kar S.K., Singh A.                                                                      | Where lies the fault in diagnosing dhat syndrome among females? Understanding through a case study                        | 2017        | Indian Journal of Psychological Medicine              |
| 11             | Venkatalakshmi P., Menon V.                                                             | Debilitating itching: An unusual presentation of dhat syndrome following recovery from dermatitis artefacta               | 2017        | Iranian Journal of Psychiatry and Behavioral Sciences |
| 12             | Kar S.K., Shahi M.K., Tripathi A.                                                       | Dhat syndrome as the prodrome of schizophrenia: Understanding                                                             | 2017        | Asian Journal of Psychiatry                           |

|    |                                                                                                                                                                          |                                                                                                                                |      |                                                   |
|----|--------------------------------------------------------------------------------------------------------------------------------------------------------------------------|--------------------------------------------------------------------------------------------------------------------------------|------|---------------------------------------------------|
|    |                                                                                                                                                                          | the cultural distress                                                                                                          |      |                                                   |
| 13 | Banerjee S., Das S., Roy A.K.                                                                                                                                            | Pattern of psychosexual disorders among male patient attending dermatology OPD in a tertiary care center - A descriptive study | 2017 | Journal of Pakistan Association of Dermatologists |
| 14 | Ventriglio A., Ayonrinde O., Bhugra D.                                                                                                                                   | Relevance of culture-bound syndromes in the 21st century                                                                       | 2016 | Psychiatry and Clinical Neurosciences             |
| 15 | Grover S., Avasthi A., Gupta S., Dan A., Neogi R., Behere P.B., Lakdawala B., Tripathi A., Chakraborty K., Sinha V., Bhatia M.S., Patjoshi A., Rao T.S.S., Rozatkar A.   | Phenomenology and beliefs of patients with Dhat syndrome: A nationwide multicentric study                                      | 2016 | International Journal of Social Psychiatry        |
| 16 | Grover S., Avasthi A., Gupta S., Hazari N., Malhotra N.                                                                                                                  | Do female patients with nonpathological vaginal discharge need the same evaluation as for Dhat syndrome in males?              | 2016 | Indian Journal of Psychiatry                      |
| 17 | Prakash S., Sharan P., Sood M.                                                                                                                                           | A study on phenomenology of Dhat syndrome in men in a general medical setting                                                  | 2016 | Indian Journal of Psychiatry                      |
| 18 | Grover S., Gupta S., Avasthi A.                                                                                                                                          | A follow-up study of patients with Dhat syndrome: Treatment pattern, outcome, and reasons for dropout from treatment           | 2016 | Indian Journal of Psychiatry                      |
| 19 | Singh A., Tripathi A., Gupta B., Agarwal V.                                                                                                                              | Pathways to Care for Dhat (Semen Loss Anxiety) Syndrome: A Study from North India                                              | 2016 | International Journal of Mental Health            |
| 20 | Kar S.K., Garg K.                                                                                                                                                        | Recurrent brief depressive disorder in Dhat syndrome: A biological or psychological phenomenon!                                | 2016 | Australian and New Zealand Journal of Psychiatry  |
| 21 | Rajkumar R.P.                                                                                                                                                            | Distinctive clinical features of Dhat syndrome with comorbid sexual dysfunction                                                | 2016 | Asian Journal of Psychiatry                       |
| 22 | Grover S., Avasthi A., Gupta S., Dan A., Neogi R., Behere P.B., Lakdawala B., Tripathi A., Chakraborty K., Sinha V., Bhatia M.S., Pattojoshi A., Rao T.S.S., Rozatkar A. | Comorbidity in Patients with Dhat Syndrome: A Nationwide Multicentric Study                                                    | 2015 | Journal of Sexual Medicine                        |
| 23 | Kar S., Sarkar S.                                                                                                                                                        | Dhat syndrome: Evolution of                                                                                                    | 2015 | Journal of                                        |

|    |                                                                               |                                                                                                                          |      |                                                              |
|----|-------------------------------------------------------------------------------|--------------------------------------------------------------------------------------------------------------------------|------|--------------------------------------------------------------|
|    |                                                                               | concept, current understanding, and need of an integrated approach                                                       |      | Human Reproductive Sciences                                  |
| 24 | Aneja J., Grover S., Avasthi A., Mahajan S., Pokhrel P., Triveni D.           | Can masturbatory guilt lead to severe psychopathology: A case series                                                     | 2015 | Indian Journal of Psychological Medicine                     |
| 25 | Prakash S., Mandal P.                                                         | Is Dhat syndrome indeed a culturally determined form of depression?                                                      | 2015 | Indian Journal of Psychological Medicine                     |
| 26 | Grover S., Gupta S., Mehra A., Avasthi A.                                     | Comorbidity, knowledge and attitude towards sex among patients with Dhat syndrome: A retrospective study                 | 2015 | Asian Journal of Psychiatry                                  |
| 27 | Kar S.K.                                                                      | Dhat syndrome: Will it reach a height or die soon?                                                                       | 2015 | Journal of Human Reproductive Sciences                       |
| 28 | Sameer M., Menon V., Chandrasekaran R.                                        | Is 'Pure' Dhat syndrome a stable diagnostic entity? A naturalistic long term follow up study from a tertiary care centre | 2015 | Journal of Clinical and Diagnostic Research                  |
| 29 | Kar S.K., Singh A.                                                            | Per-anal discharge: A new face of Dhat syndrome                                                                          | 2015 | Journal of Human Reproductive Sciences                       |
| 30 | Grover S., Gupta S., Avasthi A.                                               | Psychological correlates and psychiatric morbidity in patients with Dhat syndrome                                        | 2015 | Indian Journal of Psychiatry                                 |
| 31 | Patil M.                                                                      | From the Editor's desk                                                                                                   | 2015 | Journal of Human Reproductive Sciences                       |
| 32 | Rajkumar R.P., Kumaran A.K.                                                   | The association of anxiety with the subtypes of premature ejaculation: A chart review                                    | 2014 | Primary Care Companion to the Journal of Clinical Psychiatry |
| 33 | Grover S., Avasthi A., Aneja J., Shankar G., Mohan M R., Nehra R., Padhy S.K. | Comprehensive questionnaire for assessment of dhat syndrome: Development and use in patient population                   | 2014 | Journal of Sexual Medicine                                   |
| 34 | Rajkumar R.P., Bharadwaj B.                                                   | Dhat syndrome: Evidence for a depressive spectrum subtype                                                                | 2014 | Asian Journal of Psychiatry                                  |
| 35 | Prakash O., Kar S.K., Sathyanarayana Rao T.S.                                 | Indian story on semen loss and related Dhat syndrome                                                                     | 2014 | Indian Journal of Psychiatry                                 |
| 36 | Grover S., Kate N., Avasthi                                                   | Females too suffer from Dhat                                                                                             | 2014 | Indian Journal of                                            |

|    |                                                                                                 |                                                                                                             |      |                                                                |
|----|-------------------------------------------------------------------------------------------------|-------------------------------------------------------------------------------------------------------------|------|----------------------------------------------------------------|
|    | A., Rajpal N.,<br>Umamaheswari V.                                                               | syndrome: A case series and<br>revisit of the concept                                                       |      | Psychiatry                                                     |
| 37 | Keshavan M.S.                                                                                   | Culture bound syndromes:<br>Disease entities or simply<br>concepts of distress?                             | 2014 | Asian Journal of<br>Psychiatry                                 |
| 38 | Prakash S., Mandal P.                                                                           | Is the DSM-5 position on dhat<br>syndrome justified?                                                        | 2014 | Asian Journal of<br>Psychiatry                                 |
| 39 | Darshan M.S.,<br>Sathyanarayana Rao T.S.,<br>Manickam S., Tandon A.,<br>Ram D.                  | A case report of pornography<br>addiction with dhat syndrome                                                | 2014 | Indian Journal of<br>Psychiatry                                |
| 40 | Prakash S., Mandal P.                                                                           | Medically unexplained somatic<br>symptoms: Diagnostic and<br>treatment issues on the Indian<br>subcontinent | 2014 | American<br>Journal of<br>Psychiatry                           |
| 41 | Prakash S., Mandal P.                                                                           | Culture-bound syndromes:<br>Nosological and management<br>issues                                            | 2014 | Indian Journal of<br>Psychiatry                                |
| 42 | Deb K.S., Balhara Y.P.S.                                                                        | Dhat syndrome: A review of the<br>world literature                                                          | 2013 | Indian Journal of<br>Psychological<br>Medicine                 |
| 43 | Udina M., Foulon H.,<br>Valdés M., Bhattacharyya<br>S., Martín-Santos R.                        | Dhat syndrome: A systematic<br>review                                                                       | 2013 | Psychosomatics                                                 |
| 44 | Menéndez V., Fernández-<br>Suárez A., Placer J., García-<br>Linares M., Tarragon S.,<br>Liso E. | Dhat syndrome, an emergent<br>condition within urology in Spain                                             | 2013 | World Journal of<br>Urology                                    |
| 45 | Kattimani S., Menon V.,<br>Shrivastava M.K.                                                     | Is semen loss syndrome a<br>psychological or physical illness?<br>A case for conflict of interest           | 2013 | Indian Journal of<br>Psychological<br>Medicine                 |
| 46 | Verma R., Mina S., Ul-<br>Hassan S., Balhara Y.P.                                               | A descriptive analysis of patients<br>presenting to psychosexual clinic<br>at a tertiary care center        | 2013 | Indian Journal of<br>Psychological<br>Medicine                 |
| 47 | Prakash S.                                                                                      | The varied presentations of dhat<br>syndrome                                                                | 2013 | World Journal of<br>Urology                                    |
| 48 | Abdul Salam K.P., Sharma<br>M.P., Prakash O.                                                    | Development of cognitive-<br>behavioral therapy intervention<br>for patients with Dhat syndrome             | 2012 | Indian Journal of<br>Psychiatry                                |
| 49 | Balhara Y.P.S., Goel R.                                                                         | An unusual presentation of dhat<br>syndrome                                                                 | 2012 | Journal of<br>Neuropsychiatry<br>and Clinical<br>Neurosciences |
| 50 | Bhatia M.S., Jhanjee A.,<br>Kumar P.                                                            | Seminal retention syndrome with<br>cybersex addiction: A case report                                        | 2012 | Journal of<br>Clinical and<br>Diagnostic                       |

|    |                                                                                                        |                                                                                                                        |      |                                             |
|----|--------------------------------------------------------------------------------------------------------|------------------------------------------------------------------------------------------------------------------------|------|---------------------------------------------|
|    |                                                                                                        |                                                                                                                        |      | Research                                    |
| 51 | Balhara Y.P.S.                                                                                         | Culture-bound syndrome: Has it found its right niche                                                                   | 2011 | Indian Journal of Psychological Medicine    |
| 52 | Balhara Y.P.S., Goel R.                                                                                | Culture bound syndromes: Need to relook, relabel and include?                                                          | 2011 | Asian Journal of Psychiatry                 |
| 53 | Ashby J., Goldmeier D.                                                                                 | Postorgasm Illness Syndrome - A Spectrum of Illnesses                                                                  | 2010 | Journal of Sexual Medicine                  |
| 54 | Hallikeri V.R., Gouda H.S., Aramani S.C., Vijaykumar A.G., Ajaykumar T.S.                              | Masturbation - An overview                                                                                             | 2010 | Journal of Forensic Medicine and Toxicology |
| 55 | Mehta V., De A., Balachandran C.                                                                       | Dhat syndrome: A reappraisal                                                                                           | 2009 | Indian Journal of Dermatology               |
| 56 | El Hamad I., Scarcella C., Pezzoli M.C., Bergamaschi V., Castelli F.                                   | Forty meals for a drop of blood ...                                                                                    | 2009 | Journal of Travel Medicine                  |
| 57 | Dhikav V., Aggarwal N., Gupta S., Jadhavi R., Singh K.                                                 | Depression in Dhat Syndrome                                                                                            | 2008 | Journal of Sexual Medicine                  |
| 58 | Kendurkar A., Kaur B., Agarwal A.K., Singh H., Agarwal V.                                              | Profile of adult patients attending a marriage and sex clinic in India                                                 | 2008 | International Journal of Social Psychiatry  |
| 59 | Gautham M., Singh R., Weiss H., Brugha R., Patel V., Desai N.G., Nandan D., Kielmann K., Grosskurth H. | Socio-cultural, psychosexual and biomedical factors associated with genital symptoms experienced by men in rural India | 2008 | Tropical Medicine and International Health  |
| 60 | Prakash O., Meena K.                                                                                   | Association between Dhat and loss of energy - A possible psychopathology and psychotherapy                             | 2008 | Medical Hypotheses                          |
| 61 | Dhikav V., Aggarwal N., Anand K.S.                                                                     | Is Dhat syndrome, a culturally appropriate manifestation of depression?                                                | 2007 | Medical Hypotheses                          |
| 62 | Jadhav S.                                                                                              | Dhis and Dhāt: Evidence of semen retention syndrome amongst white Britons                                              | 2007 | Anthropology and Medicine                   |
| 63 | Ranjith G., Mohan R.                                                                                   | Dhat syndrome as a functional somatic syndrome: Developing a sociosomatic model                                        | 2006 | Psychiatry                                  |
| 64 | Chandrashekar C.R., Math S.B.                                                                          | Psychosomatic disorders in developing countries: Current issues and future challenges                                  | 2006 | Current Opinion in Psychiatry               |
| 65 | Perme B., Ranjith G., Mohan R., Chandrasekaran R.                                                      | Dhat (semen loss) syndrome: A functional somatic syndrome of the Indian subcontinent?                                  | 2005 | General Hospital Psychiatry                 |

|    |                                                                                                                                                          |                                                                                               |      |                                                                   |
|----|----------------------------------------------------------------------------------------------------------------------------------------------------------|-----------------------------------------------------------------------------------------------|------|-------------------------------------------------------------------|
| 66 | Mashhood A.A., Rauf S., Qureishi S.M.                                                                                                                    | Male sexual disorders                                                                         | 2005 | Journal of Pakistan Association of Dermatologists                 |
| 67 | Sumathipala A., Siribaddana S.H., Bhugra D.                                                                                                              | Culture-bound syndromes: The story of dhat syndrome                                           | 2004 | British Journal of Psychiatry                                     |
| 68 | Jadhav S.                                                                                                                                                | Dhāt syndrome: a re-evaluation                                                                | 2004 | Psychiatry                                                        |
| 69 | Ranjith G., Mohan R.                                                                                                                                     | Dhat syndrome: A functional somatic syndrome? [2]                                             | 2004 | British Journal of Psychiatry                                     |
| 70 | Kuruppuarachchi K.A.L.A., Wijeratne L.T., Painuly N., Chakrabarti S., Gojanur H., Shankar B.R., Gilligan D., Sumathipala A., Siribaddana S.H., Bhugra D. | The continuing story of dhat syndrome [1] (multiple letters)                                  | 2004 | British Journal of Psychiatry                                     |
| 71 | Rajesh G., Jacob K.S., Bhugra D.                                                                                                                         | Form-content dichotomy in psychopathology [6] (multiple letters)                              | 2004 | British Journal of Psychiatry                                     |
| 72 | Gojanur N.                                                                                                                                               | The continuing story of dhat syndrome.                                                        | 2004 | The British journal of psychiatry : the journal of mental science |
| 73 | Manjula M., Prasadarao P.S.D.V., Kumaraiah V., Mishra H., Raguram R.                                                                                     | Sexual dysfunction in single males: A perspective from India                                  | 2003 | Journal of Clinical Psychology                                    |
| 74 | Bihari Singh Th., Sharma S.G.                                                                                                                            | Dhat syndrome with depression                                                                 | 2003 | JMS - Journal of Medical Society                                  |
| 75 | Trollope-Kumar K.                                                                                                                                        | Cultural and biomedical meanings of the complaint of leukorrhea in South Asian women          | 2001 | Tropical Medicine and International Health                        |
| 76 | Bhatia M.S.                                                                                                                                              | An analysis of 60 cases of culture bound syndromes.                                           | 1999 | Indian journal of medical sciences                                |
| 77 | Bhatia M.S., Choudhary S.                                                                                                                                | Dhat syndrome--culture bound sex neurosis.                                                    | 1998 | Indian journal of medical sciences                                |
| 78 | Mumford D.B.                                                                                                                                             | The 'Dhat syndrome': A culturally determined symptom of depression?                           | 1996 | Acta Psychiatrica Scandinavica                                    |
| 79 | Chadda R.K.                                                                                                                                              | Dhat syndrome: is it a distinct clinical entity? A study of illness behaviour characteristics | 1995 | Acta Psychiatrica Scandinavica                                    |
| 80 | Kulhara P., Avasthi A.                                                                                                                                   | Sexual dysfunction on the indian subcontinent                                                 | 1995 | International Review of                                           |

|    |                                    |                                                                           |      |                                                    |
|----|------------------------------------|---------------------------------------------------------------------------|------|----------------------------------------------------|
|    |                                    |                                                                           |      | Psychiatry                                         |
| 81 | Joshi V.N., Money J.               | Dhat Syndrome And Dream In Trans Cultural Sexology                        | 1995 | Journal of Psychology and Human Sexuality          |
| 82 | Bhatia M.S., Malik S.C.            | Dhat syndrome - A useful diagnostic entity in Indian culture              | 1991 | British Journal of Psychiatry                      |
| 83 | Dewaraja R., Sasaki Y.             | Semen-Loss Syndrome: A comparison between Sri Lanka and Japan             | 1991 | American Journal of Psychotherapy                  |
| 84 | Chadda R.K., Ahuja N.              | Dhat syndrome: A sex neurosis of the Indian subcontinent                  | 1990 | British Journal of Psychiatry                      |
| 85 | Ann Cheng T.                       | Symptomatology of minor psychiatric morbidity: A crosscultural comparison | 1989 | Psychological Medicine                             |
| 86 | Bhatia M.S., Bohra N., Malik S.C.  | 'Dhat' syndrome--a useful clinical entity.                                | 1989 | Indian journal of dermatology                      |
| 87 | Chaturvedi S.K.                    | Psychaesthenic syndrome related to leukorrhoea in indian women            | 1988 | Journal of Psychosomatic Obstetrics and Gynecology |
| 88 | Nakra B.R.S., Wig N.N., Varma V.K. | A study of male potency disorders                                         | 1977 | Indian Journal of Psychiatry                       |
| 89 | Malhotra H.K., Wig N.N.            | Dhat syndrome: A culture-bound sex neurosis of the orient                 | 1975 | Archives of Sexual Behavior                        |
